# Supplementary material for: Exploring the ocean mesoscale at reduced computational cost with FESOM 2.5: efficient modeling strategies applied to the Southern Ocean
Source: Copernicus journal article supplement (doi:10.5194/gmd-17-529-2024), 2024-01-22
Supplement: Supplementary file 1 [file gmd-17-529-2024-supplement.pdf]

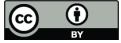

*Supplement of*

## **Exploring the ocean mesoscale at reduced computational cost with FESOM 2.5: efficient modeling strategies applied to the Southern Ocean**

**Nathan Beech et al.**

*Correspondence to:* Nathan Beech ([nathan.beech@awi.de](mailto:nathan.beech@awi.de))

The copyright of individual parts of the supplement might differ from the article licence.

Supplementary figures

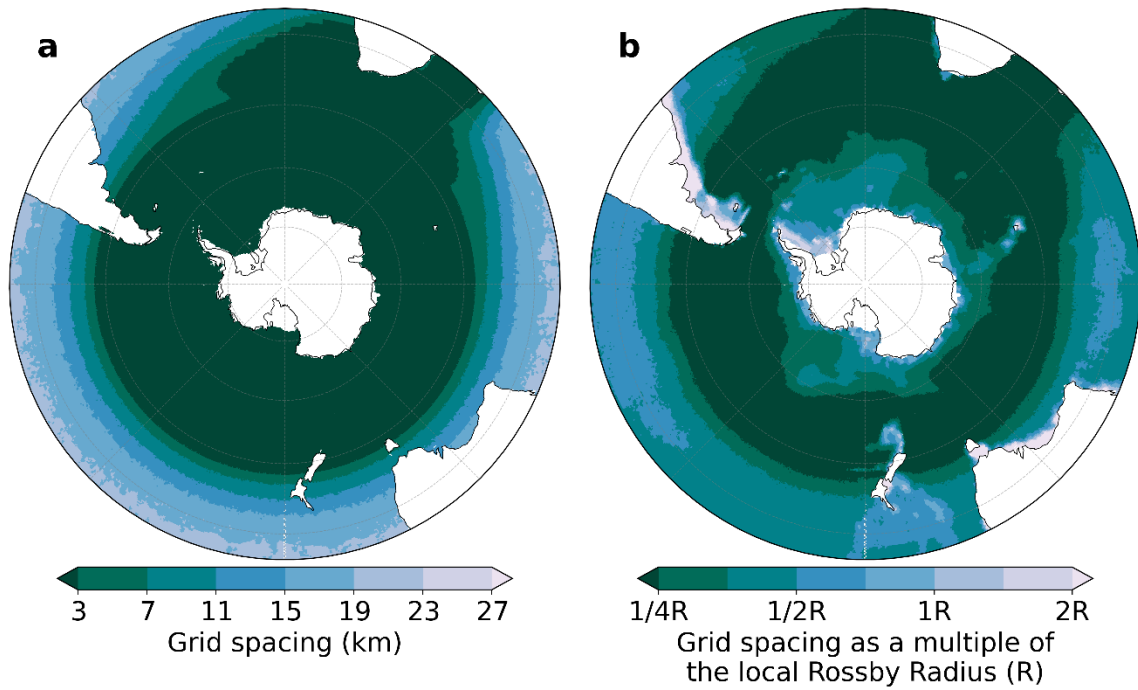

**Figure S1. Grid resolution of the SO3 mesh. a)** grid resolution expressed as approximate element height following Danilov (2022). **b)** Grid resolution expressed as a multiple of the local Rossby radius.

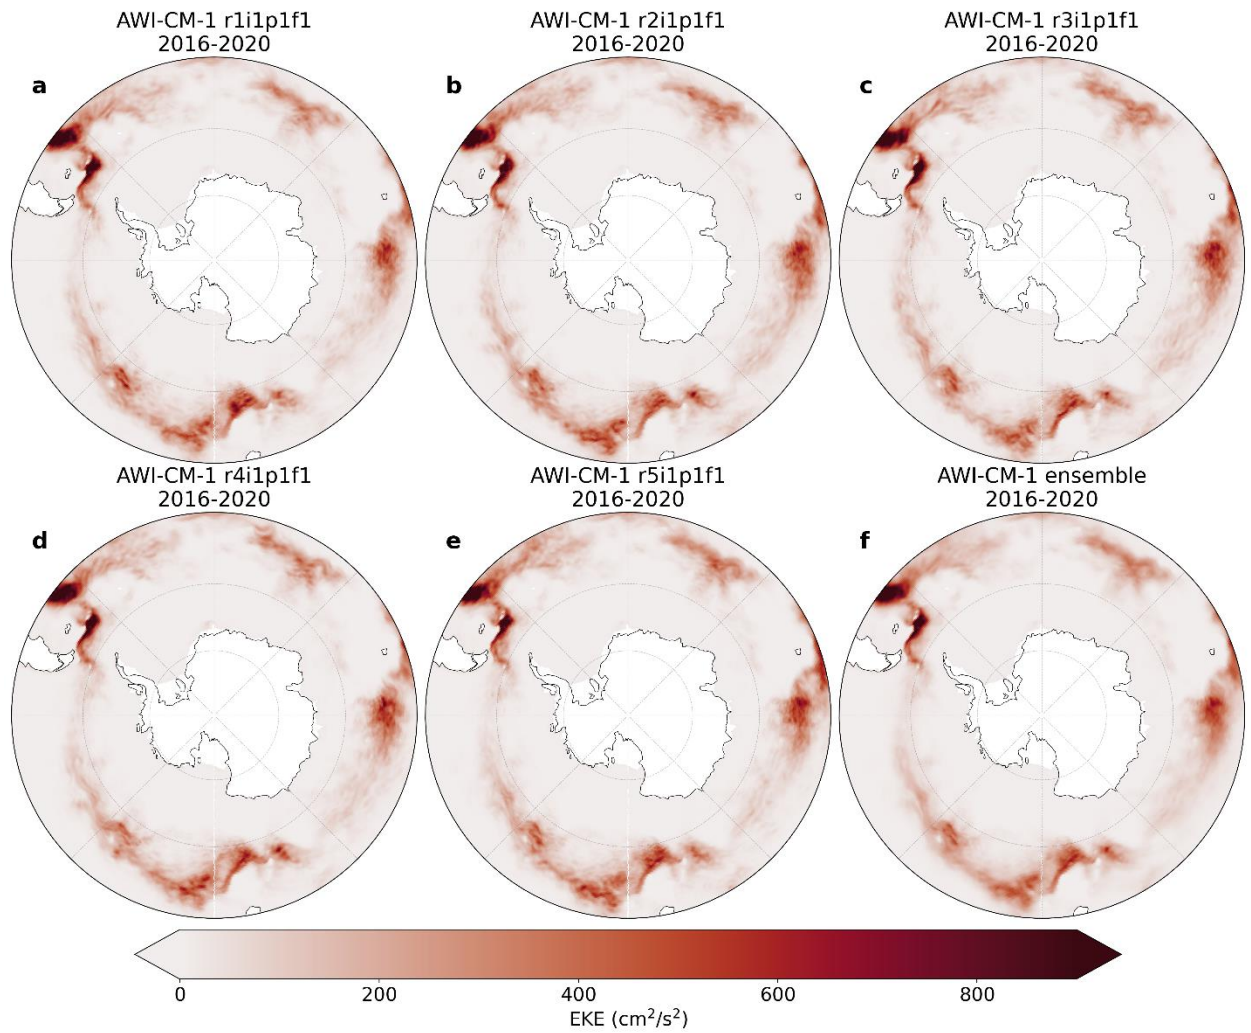

**Figure S2. Ensemble spread of mean EKE.** Mean EKE during 2016-2020 in (a-e) each member of the AWI-CM-1 ensemble and (f) the ensemble mean.

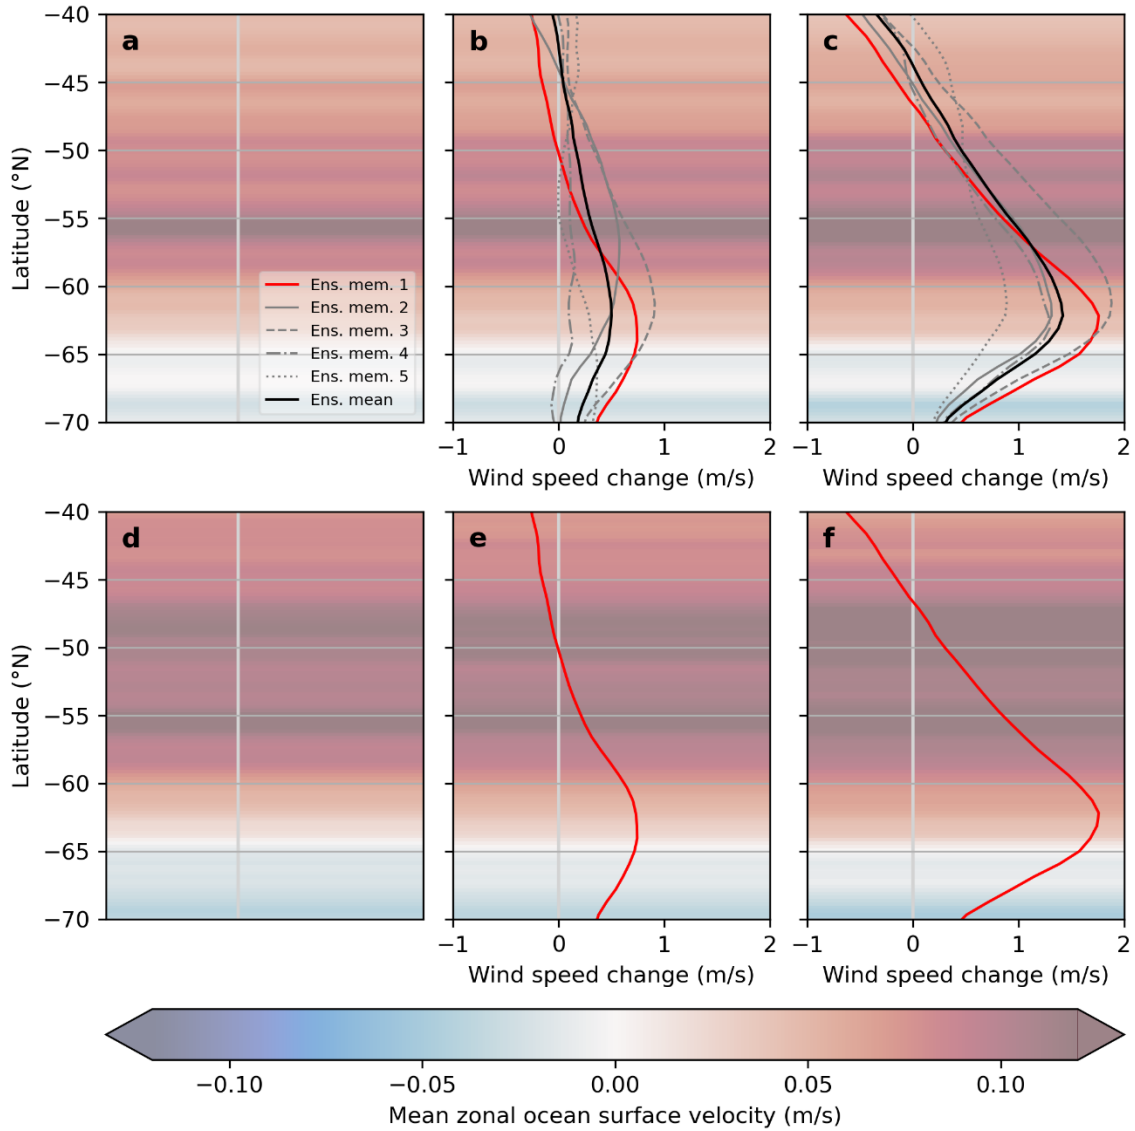

**Figure S3. Zonal mean wind speed and surface velocities.** Mean zonal surface velocities during the 1951-1955 (**a,d**), 2016-2020 (**b,e**), and 2091-2095 (**c,f**) periods in the AWI-CM-1 ensemble (**a-c**) and the SO3 simulations (**d-f**). Changes in mean zonal wind speeds relative to the 1951-1955 mean are overlaid.

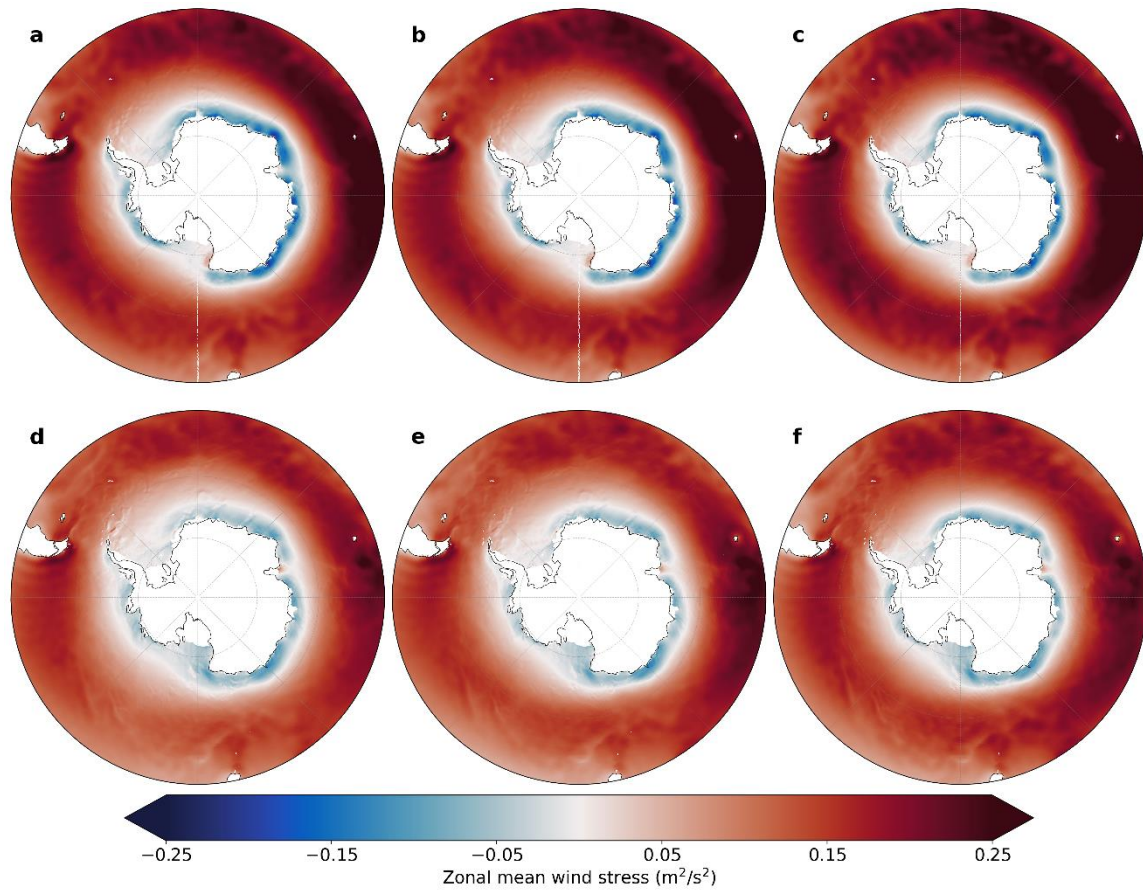

**Figure S4. Zonal mean wind stress.** Zonal mean wind stress to the ocean surface in AWI-CM-1 ensemble member 1 (a-c) and the SO3 simulations ( d-f) during the periods 1951-1955 (a,d), 2016-2020 (b,e) and 2091-2095 (c,f). Positive values indicate an eastward direction.

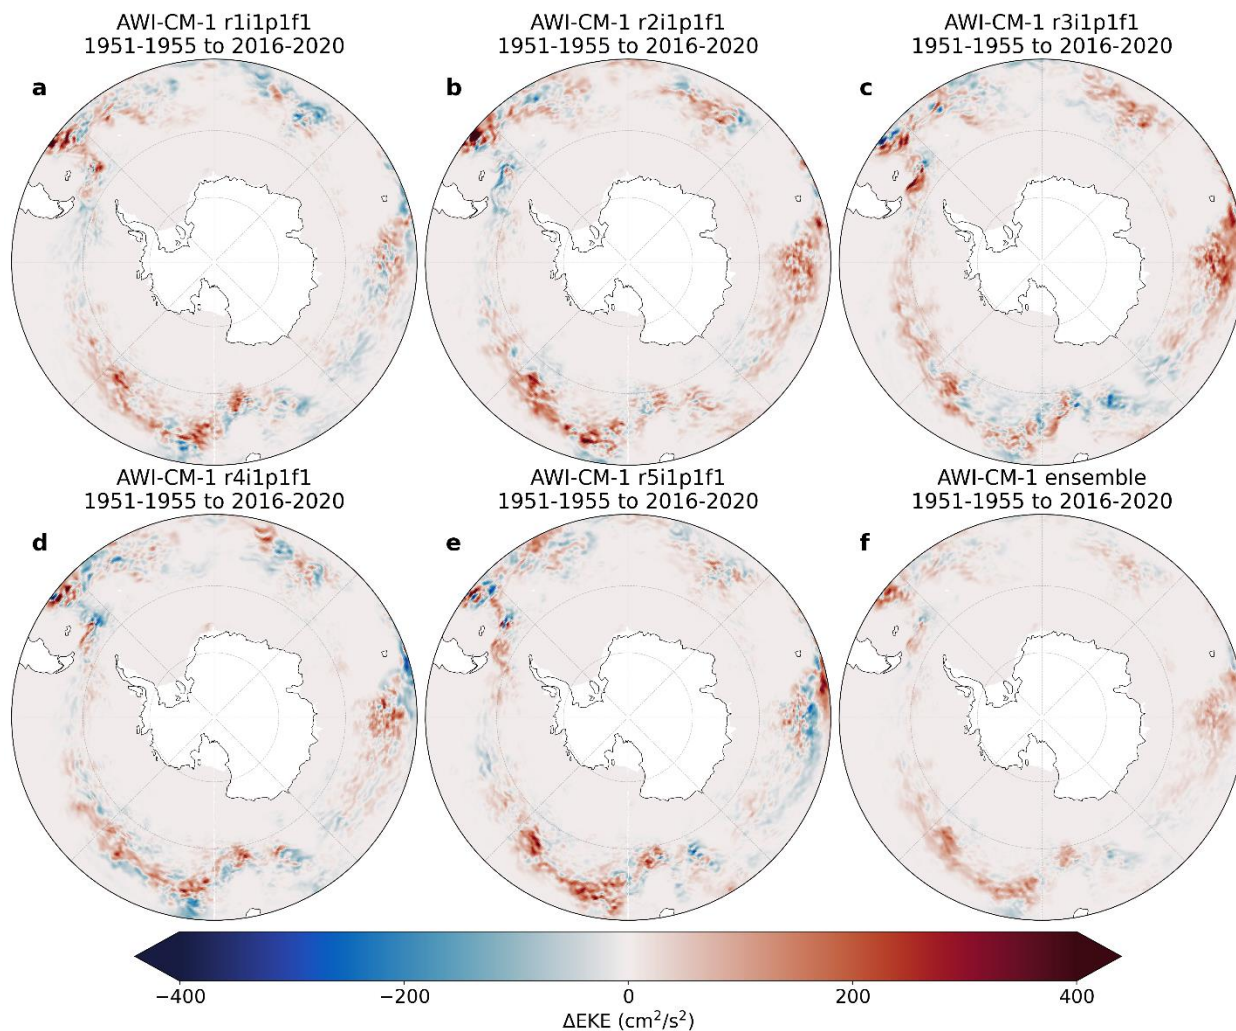

**Figure S5. Ensemble spread of EKE change between 1951-1955 and 2016-2020. EKE change in (a-e) each member of the AWI-CM-1 ensemble and (f) the ensemble mean.**

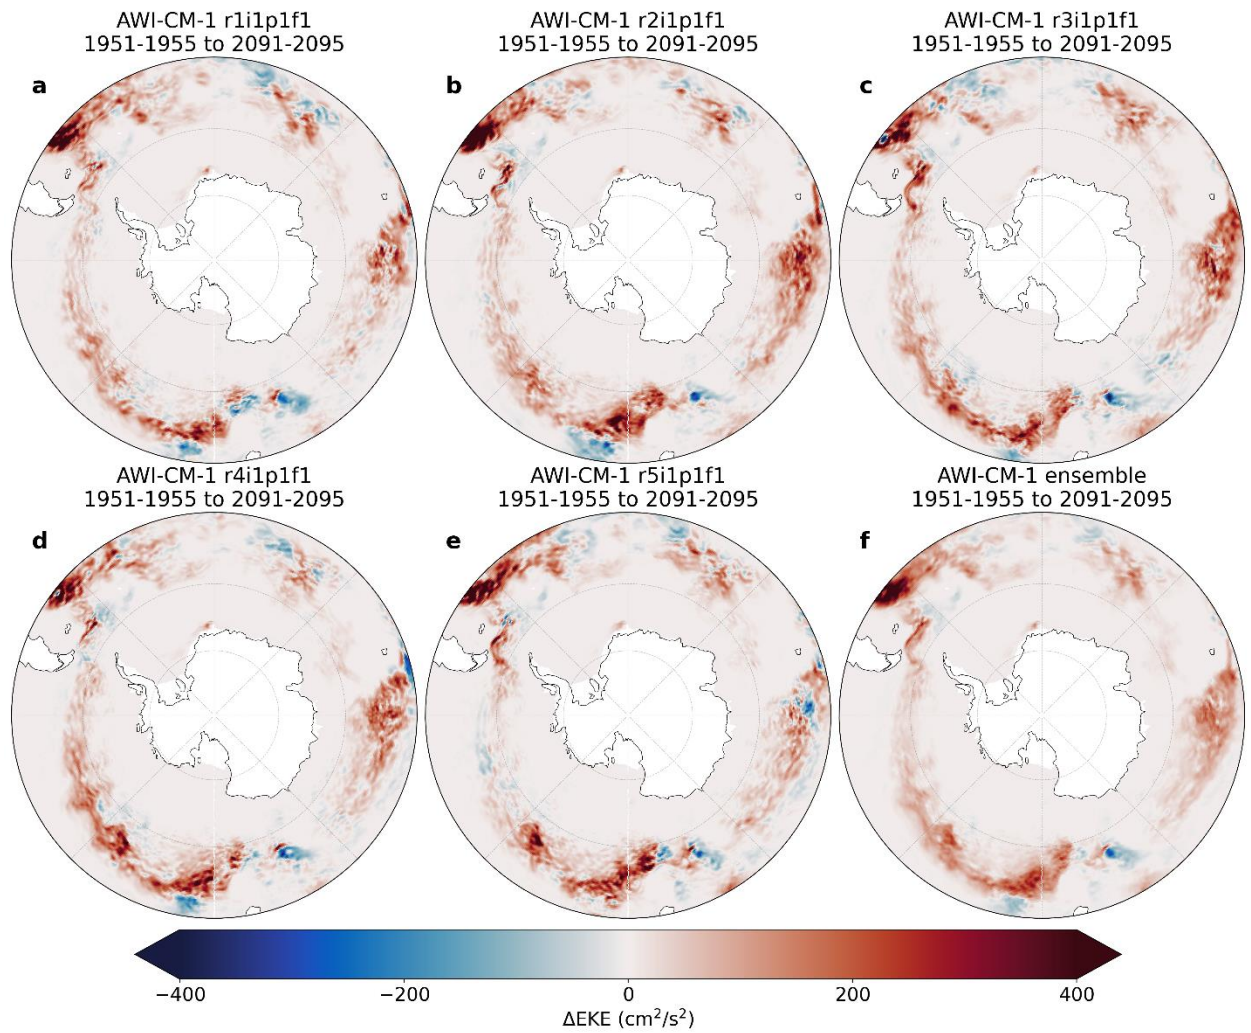

**Figure S6. Ensemble spread of EKE change between 1951-1955 and 2091-2095. EKE change in (a-e) each member of the AWI-CM-1 ensemble and (f) the ensemble mean.**

## Supplementary tables

| Data     | Durbin-Watson | Skew   | p(Skew) | Kurtosis | p(Kurt) |
|----------|---------------|--------|---------|----------|---------|
| Ens. 1   | 0.169         | 0.867  | p<0.001 | 0.536    | 0.056   |
| Ens. 2   | 0.232         | -0.075 | 0.549   | -0.156   | 0.623   |
| Ens. 3   | 0.283         | 0.198  | 0.119   | -0.270   | 0.289   |
| Ens. 4   | 0.179         | 0.176  | 0.165   | -0.220   | 0.423   |
| Ens. 5   | 0.214         | 0.400  | 0.002   | -0.439   | 0.040   |
| Ensemble | 0.206         | 0.381  | p<0.001 | 0.237    | 0.052   |
| SO3      | 0.44          | 0.432  | 0.001   | 0.013    | 0.813   |

**Table S1. EKE statistics for the 1951-1955 period.** Statistical properties reported are autocorrelation (Durbin and Watson, 1950), skewness (D'Agostino and Belanger, 1990), and kurtosis (Fisher, 1997). Statistics are calculated using 5-day mean EKE data with linear trends removed as in Figures 1a,b,c and Figure 3.

| Data     | Durbin-Watson | Skew   | p(Skew) | Kurtosis | p(Kurt) |
|----------|---------------|--------|---------|----------|---------|
| Ens. 1   | 0.226         | 0.295  | 0.021   | -0.335   | 0.157   |
| Ens. 2   | 0.255         | 0.451  | 0.001   | -0.454   | 0.031   |
| Ens. 3   | 0.245         | -0.175 | 0.167   | -0.220   | 0.425   |
| Ens. 4   | 0.216         | 0.022  | 0.860   | -0.480   | 0.020   |
| Ens. 5   | 0.267         | 0.339  | 0.009   | 0.164    | 0.427   |
| Ensemble | 0.251         | 0.179  | 0.002   | -0.263   | 0.010   |
| SO3      | 0.387         | 0.417  | 0.001   | -0.509   | 0.011   |
| Obs.     | 0.499         | 0.032  | 0.801   | -0.146   | 0.658   |

**Table S2. EKE statistics for the 2016-2020 period.** Statistical properties reported are autocorrelation (Durbin and Watson, 1950), skewness (D'Agostino and Belanger, 1990), and kurtosis (Fisher, 1997). Statistics are calculated using 5-day mean EKE data with linear trends removed as in Figures 1a,b,c and Figure 3.

| Data     | Durbin-Watson | Skew   | p(Skew) | Kurtosis | p(Kurt) |
|----------|---------------|--------|---------|----------|---------|
| Ens. 1   | 0.14          | -0.085 | 0.502   | -0.329   | 0.167   |
| Ens. 2   | 0.15          | 0.331  | 0.010   | -0.698   | p<0.001 |
| Ens. 3   | 0.264         | -0.150 | 0.235   | -0.27    | 0.289   |
| Ens. 4   | 0.199         | 0.134  | 0.289   | -0.472   | 0.023   |
| Ens. 5   | 0.133         | -0.031 | 0.806   | -0.981   | p<0.001 |
| Ensemble | 0.168         | 0.067  | 0.244   | -0.476   | p<0.001 |
| SO3      | 0.219         | -0.345 | 0.008   | -0.484   | 0.018   |

**Table S3. EKE statistics for the 2091-2095 period.** Statistical properties reported are autocorrelation (Durbin and Watson, 1950), skewness (D'Agostino and Belanger, 1990),



and kurtosis (Fisher, 1997). Statistics are calculated using 5-day mean EKE data with linear trends removed as in Figures 1a,b,c and Figure 3.

### **References**

D'Agostino, R. B. and Belanger, A.: A Suggestion for Using Powerful and Informative Tests of Normality, *Am. Stat.*, 44, 316–321, <https://doi.org/10.2307/2684359>, 1990.

Danilov, S.: On the Resolution of Triangular Meshes, *J. Adv. Model. Earth Syst.*, 14, e2022MS003177, <https://doi.org/10.1029/2022MS003177>, 2022.

Durbin, J. and Watson, G. S.: Testing for Serial Correlation in Least Squares Regression. I, *Biometrika*, 37, 409–428, <https://doi.org/10.1093/biomet/37.3-4.409>, 1950.

Fisher, R. A.: The moments of the distribution for normal samples of measures of departure from normality, *Proc. R. Soc. Lond. Ser. Contain. Pap. Math. Phys. Character*, 130, 16–28, <https://doi.org/10.1098/rspa.1930.0185>, 1997.
